1 **Temporal physiological, transcriptomic and metabolomic analyses revealed**  
2 **molecular mechanism of *Canna indica*'s response to Cr stress**

3 **Zhao Wei<sup>1</sup>, Chen Zhongbing<sup>2</sup>, Yang Xiuqing<sup>1</sup>, Sheng Luying<sup>1</sup>, Mao Huan<sup>1</sup>, Zhu Sixi<sup>1\*</sup>**

4 <sup>1</sup> College of Eco-environment Engineering, Guizhou Minzu University; The Karst Environmental Geological  
5 Hazard Prevention of Key Laboratory of State Ethnic Affairs Commission, Guiyang 550025, China.

6 <sup>2</sup> Department of Applied Ecology, Faculty of Environmental Sciences, Czech University of Life Sciences Prague,  
7 Kamýcka 129, Praha-Suchdol 16500, Czech Republic.

8

9 **Abstract:** Chromium (Cr) can interfere with plant gene expression, change the content of metabolites and  
10 affect plant growth. However, the molecular response mechanism of wetland plants at different time  
11 sequences under Cr stress has yet to be fully understood. The results showed that Cr stress increased the  
12 activities of superoxide dismutase (SOD), ascorbate peroxidase (APX) and peroxidase (POD), the contents  
13 of glutathione (GSH), malondialdehyde (MDA), and oxygen free radical (ROS), and inhibited the  
14 biosynthesis of photosynthetic pigments, thus leading to changes in plant growth and biomass. that Cr  
15 stress mainly affected 12 metabolic pathways, involving 38 differentially expressed metabolites, including  
16 amino acids, phenylpropane, and flavonoids. A total of 16247 differentially expressed genes were identified,  
17 among which, at the early stage of stress, *C. indica* responds to Cr toxicity mainly through galactose, starch  
18 and sucrose metabolism. With the extension of stress time, plant hormone signal transduction and MAPK  
19 signaling pathway in *C. indica* in the treatment group were significantly affected. Finally, in the late stage  
20 of stress, *C. indica* co-defuses Cr toxicity by activating its Glutathione metabolism and Phenylpropanoid  
21 biosynthesis. In conclusion, this study revealed the molecular response mechanism of *C. indica* to Cr stress  
22 at different times through multi-omics methods.

23 **keyword:** Chromium; *Canna indica*; Physiology; Transcriptome; Metabolome

## 24 1. Introduction

25 Heavy metal pollution has become a global environmental problem (Uchimiya et al., 2020). In recent  
26 years, due to the influence of human activities, Cr has been widely distributed in soil and water (Xing et al.,  
27 2021). Among them, industrial activities (such as electroplating, smelting, and mining) and agricultural  
28 activities (such as pesticide use and fertilizer application) are the primary sources of Cr pollution (Hakan et  
29 al., 2021). In nature, Cr exists in trivalent ( $\text{Cr}^{3+}$ ) and hexavalent ( $\text{Cr}^{6+}$ ) forms, with  $\text{Cr}^{6+}$  having good  
30 mobility and toxicity (Ahmad et al., 2020). Although Cr is a non-essential element in plants, it can still  
31 accumulate in large amounts in plant roots and aboveground parts (Yu et al., 2018). Even trace levels can  
32 harm plants' morphological, physiological, and molecular characteristics (Arun et al., 2005). In addition, at  
33 high concentrations, Cr can lead to a variety of toxic symptoms in plants, such as inducing oxidative stress,  
34 resulting in excessive production of reactive oxygen species (ROS), reducing the activity of antioxidant  
35 enzymes, blocking the synthesis of photosynthetic pigments, inhibiting photosynthesis, thus affecting plant  
36 growth and development and reducing their biomass (Sinha et al., 2018). In addition, Cr is a  
37 non-biodegradable heavy metal element that can exist in plants for a long time and pose a potential threat to  
38 human and animal health through its spread through the food chain (Riti et al., 2022). Therefore, the  
39 remediation of Cr-contaminated soil is necessary and urgent.

40 In the past few decades, several remediation methods for Cr contamination have emerged, among  
41 which physical, chemical, and biological methods have been successfully applied to the remediation of  
42 Cr-contaminated soils (Singh et al., 2022). Compared with traditional restoration techniques,  
43 phytoremediation is an aesthetic, economical, and publicly recognized in-situ bioremediation technology  
44 (Ashraf et al., 2019). It can provide an effective solution for soil removal, transfer, degradation, and  
45 fixation of Cr (Ao et al., 2022). However, some challenges remain in its application, as phytoremediation  
46 mainly depends on the concentration of Cr in the soil (Anastasis et al., 2021). Therefore, screening  
47 Cr-tolerant plants and understanding the molecular response mechanism of these plants on Cr tolerance is  
48 the focus of phytoremediation research, which will further promote the remediation effect of  
49 Cr-contaminated soil (Vibha et al., 2018). At present, some Cr-tolerant plants have been identified by  
50 studies. There are *Leersia hexandra* (Zhang et al., 2022a), *C. indica* (Zhao et al., 2017), *Cyperus*  
51 *alternifolius* (Wang et al., 2021a), *Medicago sativa* (Wang et al., 2012). These plants have evolved various  
52 defense and detoxification mechanisms to cope with heavy metal chromium (HMC) stress. Among them,  
53 the cell wall is the first physical barrier that effectively inhibits Cr from entering root cells (Wang et al.,  
54 2021b; Yuan et al., 2022a), which can significantly reduce Cr absorption and fix Cr in the cell wall. When  
55 the first barrier is breached, plants activate their antioxidant defense system and use vacuoles for  
56 compartments, thus alleviating the toxic effects of Cr (Zhong et al., 2019). However, due to the diversity of  
57 plants, we need to explore whether there is a common response mechanism among different  
58 Cr-accumulating plants.

59 *C. indica* belongs to *Canna indica*, a perennial herbaceous species, showing a developed root system,  
60 strong adaptability to the living environment, rapid growth, large leaf area and other characteristics, and  
61 strong enrichment ability to heavy metals (Zhang et al., 2012). In treating contaminated wastewater  
62 containing heavy metals such as Cr, it is found that it has a robust, comprehensive tolerance, which can  
63 quickly adjust its own physiological and biochemical characteristics, showing strong tolerance (Liu et al.,  
64 2011). At present, a large number of studies have focused on the response mechanism of *C. indica* to Cr  
65 stress in morphology, physiology, and biochemistry, including plant biomass, plant chelate (PC) synthesis,  
66 photosynthetic pigment, antioxidant defense system, and organic acid secretion (Dong et al., 2019; Zhang  
67 et al., 2020; Xiang et al., 2022). Our previous studies showed that the contents of chlorophyll,

68 malondialdehyde (MDA), and reduced glutamate (GSH) in *C. indica* seedlings changed significantly with  
69 increased Cr concentration. Moreover, the activities of enzymes related to the antioxidant mechanism (SOD,  
70 CAT, POD, and PAL) were also changed (Zhao et al., 2017). However, the underlying molecular  
71 mechanism of *C. indica* under Cr stress remains largely unknown. In recent years, with the development of  
72 transcriptome sequencing (RNA-Seq) and metabolomics techniques, they have been widely used to reveal  
73 the different response mechanisms of different plants to Cr stress. Including *Zea mays* (Hakan et al., 2021),  
74 *Helianthus annuus* (Ibarra et al., 2019), *Arabidopsis thaliana* (Jia et al., 2016), *Sorghum bicolor* (Roy et al.,  
75 2016). Therefore, by taking *C. indica* as the research object and combining it with multi-omics techniques,  
76 we can improve the knowledge gap of *C. indica*'s response to Cr stress at the molecular level.

77 Therefore, physiological, transcriptomic, and metabolomic methods were used in this study to analyze  
78 the molecular response mechanism of *C. indica* to Cr stress at different exposure times. We hypothesized  
79 that Cr stress could induce the abnormal expression of many genes and metabolites related to the  
80 antioxidant and detoxification mechanisms of *C. indica*. The purpose of this study was to: (a) analyze the  
81 accumulation and transport of Cr by *C. indica* and its physiological changes under Cr stress at different  
82 exposure times; (b) identify their key metabolic pathways in differential expressed genes (DEGs) and  
83 differentially expressed metabolites (DEMs); (c) reveal the molecular mechanism of *C. indica* tolerance  
84 under Cr stress at different exposure times, to provide a theoretical basis for phytoremediation of soil Cr  
85 pollution, and identify essential phytoremediation candidate genes to provide a theoretical basis for future  
86 research.

87

## 88 2. Materials and methods

### 89 2.1. Plant cultures and Cr treatment

90 The *C. indica* seedlings used in this study were hydroponically grown by Songnan Plant Seedling  
91 Company of Luzhi town, Suzhou City. Firstly, *C. indica* seeds of the same size were screened. After  
92 sterilization, seeds were cultured in Petri dishes, waiting for germination, and then moved to nutrient water  
93 for hydroponics. When the plants grew to about 10 cm, we purchased seedlings from the company and  
94 selected seedlings with similar growth conditions for the experiment. The selected *C. indica* seedlings were  
95 surface disinfected with 75% ethanol and 1% sodium hypochlorite solution for 10 s and 15 min. Carefully  
96 washed with deionized water five times, furthermore transplanted in the potted greenhouse (500g of soil  
97 per pot). All seedlings were then earth culture in a controlled greenhouse (176  $\mu\text{mol m}^{-2} \text{s}^{-1}$  light intensity,  
98 12 h photoperiod, 25 °C constant temperature). Seedlings were domesticated in the greenhouse for 30 days  
99 before exposure to Cr. Hoagland solution (15 mL) and water (15 mL) were added to the pot every 15 days  
100 and every three days, respectively, and Hoagland nutrient solution was not added after Cr stress.  
101 Twenty-one seedlings with similar growth conditions were randomly divided into seven groups with three  
102 plants in each group (as three biological replicates): four groups were the control group (0 mg/kg  $\text{K}_2\text{Cr}_2\text{O}_4$ ),  
103 and the other three groups were the Cr treatment group (100 mg/kg  $\text{K}_2\text{Cr}_2\text{O}_4$ ). Seedlings were treated for 0,  
104 7, 14, and 21 days before harvest (three plants at 0 days, six plants at 7 days, six plants at 14 days, and six  
105 plants at 21 days). Root (R) tissue from both Cr-treated and untreated seedlings was sampled  
106 simultaneously on corresponding days and immediately frozen in liquid nitrogen and stored in a -80 °C  
107 freezer until further treatment. Finally, 21 samples were collected and prepared for transcriptomic and  
108 metabolomic analysis. Similarly, samples (21 seedlings) for biochemical analysis were collected in this  
109 manner.

### 110 2.2. Cr content in soil and plants

111 After the harvest of plant samples, all soil samples were placed on yellow paper and air-dried at the

112 vent. After air drying, soil samples were repeatedly knocked in a cloth bag, screened with 100 mesh, and  
113 then placed in a separate sealed bag for subsequent determination. After weighing 0.5 g of soil sample and  
114 preparing to reverse king's water with a ratio of 1:3 (concentrated hydrochloric acid and concentrated nitric  
115 acid), the two were added into the digestion tube in turn, and the digestion was heated on the electric  
116 heating plate under the fume hood. First, the digestion was conducted at 160 °C for one hour, then 3 ml  
117 perchloric acid was added for another hour after the temperature was raised to 200 °C, and the remaining  
118 liquid was moved to the test tube. It was fixed with 1% dilute nitric acid. Plant samples (directly after  
119 harvest) were dried in a 105 °C oven for 12 hours. After that, the samples were ground to a diameter of less  
120 than 0.02 mm. The plant samples (0.5 g of each) were added with 37% HCl and 63% HNO<sub>3</sub>, sealed, and  
121 put into the oven at 150°C for digestion for 10 hours. Then dilute the suspension with 3 ml HNO<sub>3</sub>. The Cr  
122 analysis for soil and plant samples was performed using inductively coupled plasma mass spectrometry  
123 (ICP-MS) (Agilent, 7800 ICP-MS, USA) (Meng et al., 2022).

### 124 **2.3. Soil indicator and Physiological index of plants**

#### 125 **2.3.1. Soil Physicochemical Properties**

126 Soil pH and EC was measured by the potentiometric method. Soil organic matter (SOM) was  
127 measured by K<sub>2</sub>Cr<sub>2</sub>O<sub>7</sub>-H<sub>2</sub>SO<sub>4</sub> oxidation-external heating method (Bao, 2000).

#### 128 **2.3.2. Chlorophyll and carotenoid contents**

129 Two leaves of 0.1g *C. indica* were collected and placed in a mortar with a small amount of powder  
130 (about 50 mg) and a small amount of Chlorophyll Assay Buffer and Carotenoid Assay Buffer, respectively.  
131 Then it was ground into homogenate, transferred to a 10 ml centrifuge tube, supplemented with leaves of  
132 Chlorophyll Assay Buffer and Carotenoid Assay Buffer to 10 ml, and placed away from light for 5 min-2 h.  
133 When the tissue was close to white and pigment extraction was completed, after centrifugation, the  
134 supernatant was taken to determine chlorophyll a, chlorophyll b, and carotenoids at 665 nm, 649 nm, and  
135 470 nm, respectively (Fan et al., 2018).

#### 136 **2.3.3. SOD, POD, and APX contents**

137 Superoxide dismutase (SOD, EC 1.15.1.1) and peroxidase (POD, EC 1.11.1.7) in *C. indica* leaves  
138 were determined using a specified kit according to a protocol provided by manufacturer Suzhou Keming  
139 Biotechnology Co., LTD (www.cominbio.com). and ascorbate enzyme (APX) levels. Conditions 5 (BDTS,  
140 USA) multifunctional ELISA measured absorbance at 560 nm, 240 nm, 470 nm, and 290 nm, respectively.

#### 141 **2.3.4. MDA, GSH and ROS levels in plants**

142 For MDA analysis, 10% cold trichloroacetic acid was added into 0.1g ground sample and centrifuge at  
143 4000 r/min for 10 min. Then, 2 ml 0.6% thiobarbituric acid was added to the samples and treated in a  
144 100 °C water bath for 15 min. The supernatant was quickly cooled and centrifuged again. Absorbance was  
145 measured at 600 nm and 532 nm, and MDA content was calculated following the previous description  
146 (Mbonankira et al., 2015).

147 The aerial parts of 0.1g of *C. indica* were weighed, ground with EDTA-TCA reagent, and diluted in a  
148 25 ml volumetric flask. Then, 2 ml of the filtrate was added to 0.4 ml of 1 mol/L NaOH reagent, and PBS  
149 reagent and 0.1 ml of TDNB reagent were added to the solution at pH 6.5-7.0; the test tube to which only  
150 K<sub>3</sub>PO<sub>4</sub> was added served as a control. Finally, the samples were incubated at 25°C for 5 min to allow  
151 full-color development, absorbance was measured at 412 nm, and GSH content was calculated following  
152 the previous description (Meng et al., 2022).

153 Reactive oxygen species (ROS) were detected by fluorescent probe DCFH-DA using a specified kit.  
154 Dcfh-da itself has no fluorescence and can freely cross the cell membrane. After entering the cell, it can be  
155 hydrolyzed by intracellular esterase to produce DCFH. However, DCFH cannot penetrate the cell

156 membrane, making it easy for the probe to be loaded into the cell. Moreover, intracellular reactive oxygen  
157 species can oxidize non-fluorescent DCFH to produce fluorescent DCF. Detecting the fluorescence of DCF  
158 can measure the level of Reactive oxygen species (ROS) in the leaves of *C. indica*. Conditions 5 (Berten,  
159 USA) multifunctional ELISA instrument was used to measure the fluorescence intensity for 10 min, with  
160 an excitation wavelength of 499 nm and emission wavelength of 521 nm.

### 161 **2.3.5. Soluble matter contents in plants**

162 Soluble sugar content was measured following the guidelines of Gao et al. (Gao et al., 2006). First,  
163 0.1g leaves were placed in a test tube filled with distilled water, boiled at 100 °C for 20 min, and cooled in  
164 a 100 ml volumetric bottle at constant volume. Then, 1 ml was absorbed, and 5 ml of anthrone-measuring  
165 reagent was added. After the mixture was treated in boiling water, absorbance was measured at 620 nm, and  
166 soluble sugar content was calculated.

### 167 **2.4. Transcriptome analysis**

168 Novaseq 6000 (Illumina) was used for transcriptome sequencing to understand further the molecular  
169 response mechanism of Cr detoxification in *C. indica* to determine the changes in gene expression in the  
170 roots of *C. indica* under Cr stress at different times. Root tissue (3 replicates per group) of 0.5 g was taken  
171 from Cr-treated and untreated *C. indica* seedlings at days 0, 5, 10, and 15 and were frozen in liquid nitrogen.  
172 The RNA of root samples of *C. indica* under CK and Cr treatments (including three biological replications)  
173 was extracted by TRIzol® Reagent (Invitrogen, USA), purified by Plant RNA Purification Reagent  
174 (Invitrogen company), and sequenced on the HiSeq 6000 Illumina sequencing platform by Shanghai  
175 Majorbio Bio-pharm Technology Co. Ltd, China. The DEGs of the root of *C. indica* between the CK and  
176 Cr treatments were identified by DEGseq2. The functional annotation of DEGs was subjected to Swiss-Prot  
177 annotation, Clusters of Orthologous Groups of proteins (COG), Gene Ontology (GO) classification, and  
178 Kyoto Encyclopedia of Genes and Genomes (KEGG) database by the free online platform of Majorbio  
179 ([www.majorbio.com](http://www.majorbio.com)).

### 180 **2.5. Metabolomics analysis**

181 Root tissue of 0, 7, 14, and 21-day time series from Cr-treated and untreated *C. indica* seedlings (3  
182 replicates per group) was taken at about 1 g (3 replicates per group), weighed, and frozen in liquid nitrogen.  
183 After natural air drying, root samples were ground to powder, and metabolites were extracted and analyzed.  
184 The amount of 60 mg ground powder was ultrasonically extracted with 0.6 ml methanol/water (7:3, v/v) for  
185 30 min followed by 20 min incubation at -20 °C, coupled with an internal standard of L-2-Cl-Phe (0.3 mg  
186 ml<sup>-1</sup>). The extracts were centrifuged at 14,000 rpm for 10 min at 4 °C. Then, 200 µl of supernatant was  
187 filtered through a 0.2 µm filter and measured using a Waters VION IMS Q-TOF Mass Spectrometer  
188 equipped with an electrospray interface (Waters Corporation, Milford, MA, USA) platform as described  
189 elsewhere (Su et al., 2021).

### 190 **2.6. Statistical analysis**

191 Shapiro-Wilk and Levene's tests were performed to test the normality and homogeneity of data. The  
192 natural logarithm was applied to transform the data that did not obey a normal distribution. Statistical  
193 analyses were performed by SPSS software (version 26.0). All values are expressed as the mean ± standard  
194 deviation. All data were checked for normality before two-way analyses of variance (two-way ANOVA).  
195 All statistical tests with p<0.05 were considered significant. All the transcriptome and metabolome  
196 visualizations (Venn diagrams, heat maps, volcano maps, etc.) were made using an online platform  
197 ([www.majorbio.com](http://www.majorbio.com)). The graphics were drawn using Origin 2021 and Adobe Illustrator CC 2019.

198  
199

## 200 **3 Results and analysis**

### 201 **3.1 Physiological changes and Cr accumulation of *C. indica* under Cr stress**

202 In this study, compared with group Cr0, pH and EC in soil increased significantly after Cr(VI) was  
203 added, but their values decreased substantially with increased stress time. Meanwhile, soil organic matter  
204 (SOM) content decreased significantly with the increase in stress time. However, it was significantly higher  
205 than that of the control group at 14 and 21 days (Figure 1A). In addition, prolonged Cr stress time  
206 significantly decreased the biomass of *C. indica*. In addition, with the increased Cr stress time, the contents  
207 of carotenoid and total chlorophyll also reduced significantly, especially in group Cr7, which decreased by  
208 50.22% and 33.85% compared with group Cr0 (Figure 1B). Meanwhile, with the increase of Cr stress time,  
209 the contents of Cr(VI) and Cr(III) in soil showed a trend of first increasing and then decreasing. In contrast,  
210 the Cr content in *C. indica* showed a trend of significantly increasing all the time and reached the maximum  
211 value in group Cr21 (Table 1). In addition, it was observed in this study that the biomass and  
212 photosynthetic pigment content of *C. indica* showed the maximum value in the CK7 group (Figure 1B, E).  
213 In summary, these results indicate that prolonged stress time can significantly inhibit the growth of *C.*  
214 *indica* and increase the contents of Cr of different forms in plants under high Cr stress.

215 In this study, after the addition of Cr(VI), the activities of superoxide dismutase (SOD) and  
216 APX(ascorbate peroxidase) in *C. indica* of group Cr21 were increased by 75.49% and 56% compared with  
217 that of group Cr0, respectively (Figure 1C). In contrast, POD(peroxidase) activity showed the highest value  
218 in the Cr7 group, which increased by 13.02% compared with the Cr0 group. With increased Cr stress time,  
219 the activity of antioxidant enzymes showed an increasing trend. In addition, it can be seen from the change  
220 of glutathione (GSH) and soluble sugar content in *C. indica* that the content of GSH and soluble sugar is  
221 increasing ( $p < 0.05$ ), and its maximum value was found in group Cr21. At the same time, the contents of  
222 malondialdehyde (MDA) and reactive oxygen species (ROS) were also significantly increased after Cr(VI)  
223 was added, and reached their peaks in Cr7 and Cr21 groups, respectively (Figure 1D, E). These results  
224 indicate that Cr stress can interfere with the everyday life activities of plants, induce oxidative stress, and  
225 activate the oxidative stress mechanism of plants to cope with Cr stress.

### 226 **3.2 Metabolomic analysis**

#### 227 **3.2.1 Metabolic changes of *C. indica* roots under Cr stress**

228 In this study, non-targeted metabolomics (LC-MS) was used to study the metabolism of *C. indica*  
229 roots to identify the different metabolites associated with Cr immobilization in *C. indica* roots to  
230 understand better the stress response mechanism of *C. indica* roots under Cr stress. Firstly, PCA and  
231 PLS-DA analysis were performed on four groups of cluster data with different treatments. PCA analysis  
232 could indicate the overall metabolism differences among treatment groups and the degree of variation  
233 among each sample. The results showed that Cr stress had little effect on the metabolites in the roots of *C.*  
234 *indica* under cationic mode (Figure 2A). At the same time, there was a significant partitioning phenomenon  
235 between Cr14 and Cr21 groups and the Cr0 groups due to the significant differences between groups in the  
236 Cion mode (Figure 2A, C).

237 Compared with PCA analysis, PLS-DA analysis is a discriminant analysis method in multivariate data  
238 analysis technology, which can effectively distinguish the values between groups and find the variables that  
239 affect the differences between groups. This study showed that the PLS-DA scatter in all treatment groups  
240 showed an apparent partitioning phenomenon in the cationic mode (Figure 2B, D). Meanwhile, in the  
241 cationic mode, the differential interpretation rate of PLS-DA analysis reached 51.7%, which reflected the  
242 reliability and applicability of this data for future studies (Figure 2B). In summary, these results suggest  
243 that Cr stress can significantly affect the composition of metabolites in the roots of *C. indica*.

### 244 3.2.2 Cluster analysis of DEMs in the roots of *C. indica*

245 In this study, A total of 243 kinds of DEMs were selected by Veen analysis (VIP>1 and P<0.05); three  
246 of these were DEMs shared by each comparison group (Figure 3A). At the same time, this study used  
247 cluster analysis to study the metabolic changes in the roots of *C. indica*, and showed them in the heat map.  
248 In the heat map, red represented up-regulated metabolites, and blue represented down-regulated metabolites.  
249 Different color module matrices revealed the differential distribution of metabolites in the roots of *C. indica*  
250 under Cr stress, directly expressing the significant differences between the DEMs in the Cr-exposed group  
251 and the control group (Figure 3B, C, D). 38 DEMs were detected in the Cr0 vs Cr7 comparison group, with  
252 24 up-regulated and 14 down-regulated metabolites. Up-regulated metabolites include Chrysoidine free  
253 base and Citicoline. Similarly, 95 DEMs were detected in the Cr0 vs Cr14 comparison group (15  
254 up-regulated and 80 down-regulated). Gln Val Tyr Asp, Phytosphingosine-1-P, Methyl jasmonate,  
255 M-Coumaric acid, and P-Tolualdehyde were particularly abundant in the Cr-contaminated group. As Cr  
256 stress duration increased, more up-regulated DEMs were detected in the Cr0 vs Cr21 comparison group.  
257 Asp Ile Gln Gly, Gln Val Tyr Asp, L-Aspartic acid, L-Glutamate, M-Coumaric acid, Mevalonic acid, and  
258 Flumiclorac-pentyl were most abundant (Figure 3B, C, D; Table S1). Notably, Gentiopicrin was  
259 significantly expressed in all three comparison groups (Table S1). Meanwhile, we identified the top ten  
260 DEMs in each comparison group based on changes in differential metabolites (Figure S2A). The volcano  
261 map visually illustrates DEM changes (Figure S2B).

262 Under Cr stress, Among the secondary metabolite classes, the DEMs are mainly Flavonoids (28.57%),  
263 Phenylpropanoids (20%), Terpenoids (31.43%), Fatty acids-related compounds (8.57%), and Alkaloids  
264 (5.7%) (Figure S1A; Table S2), in the classification of lipid compounds, It is mainly composed of Fatty  
265 acyls (37.5%), Glycerolipids (12.5%), Glycerophospholipids (36.54%), Polyketides (8.65%), and Sterol  
266 lipids (8.65%) (Figure S1B; Table S2). These results suggest that amino acids, phenylpropanoids,  
267 flavonoids, terpenoids, Fatty acyls, and Glycerophospholipids may play a crucial role in detoxifying Cr in  
268 *C. indica* roots.

### 269 3.2.3 Analysis of enrichment of KEGG functional pathway in DEMs in *C. indica* roots

270 Through the enrichment analysis of the KEGG pathway, the biological pathways between different  
271 comparison groups were determined to further explore the metabolic mechanism of *C. indica* to Cr stress.  
272 First, we searched and annotated the DEMs in *C. indica* roots under different Cr treatments and screened  
273 out the top 20 metabolic pathways in enrichment (Figure 4A; Table S3). It mainly includes Purine,  
274 Glycerophospholipid, Tyrosine, Arachidonic acid, Phenylalanine, Alanine, aspartate and glutamate  
275 metabolism, Phenylpropanoid, Phenylalanine, tyrosine, and tryptophan biosynthesis, ABC transporters. The  
276 Biosynthesis of cofactors was mainly enriched in the Cr0 vs Cr7 comparison group. Phenylalanine  
277 metabolism, Sphingolipid, N-Glycan, Glycosylphosphatidylinositol (GPI)-anchor biosynthesis, and  
278 Autophagy was enriched primarily on the Cr0 vs Cr14 comparison group. With prolonged stress, The  
279 significantly enriched metabolic pathways in the Cr0 vs Cr21 comparison group mainly included Histidine,  
280 Arachidonic acid, Alanine, aspartate and glutamate, Nicotinate and nicotinamide metabolism, and Arginine  
281 biosynthesis. It should be noted that Glycerophospholipid metabolism is significantly enriched in Cr7, Cr14,  
282 and Cr21 (Figure 4B, C, D; Table S4). Therefore, these DEMs-enriched pathways in *C. indica* may play an  
283 essential role in plant response to Cr stress.

## 284 3.3 Transcriptomic analysis

### 285 3.3.1 Gene function annotation

286 Novaseq 6000 (Illumina) was used for transcriptional sequencing to understand further gene  
287 expression changes in *C. indica* roots under Cr stress. In this study, 216,527 genes and 516,953 transcripts

288 were identified in 6 different databases, among which the NR database had the highest annotation rate, and  
289 49,065 genes were significantly annotated (Table S5; Figure S3). In addition, a total of 155.92 Gb of Clean  
290 Data was obtained from 21 samples in this study, and all Q20 and Q30 values were greater than 98% and  
291 94%, respectively (Table S6). These results reflect the reliability and applicability of this data for future  
292 studies.

### 293 **3.3.2 Analysis of differentially expressed genes (DEGs) and changes in gene expression**

294 In this study, the up-regulated and down-regulated DEGs in the Cr0 group were compared with those  
295 in the Cr7, Cr14, and Cr21 treatment groups. The results showed that with the extension of Cr stress time,  
296 the up-regulated genes of *C. indica* root increased significantly, with 1393(440 up-regulated and 953  
297 down-regulated) in the three comparison groups, respectively. 6771(2,964 up-regulated and 3,807  
298 down-regulated) and 8083(4,306 up-regulated and 3,777 down-regulated)(Figure 5A). Among them, the top  
299 15 up-regulated and down-regulated genes with differentially expressed levels among the comparison  
300 groups are shown in Table S7. Meanwhile, the total number of up-regulated and down-regulated DEGs  
301 among the comparison groups was 439 and 133, respectively (Figure 5B, C). In addition, based on the  
302 magnitude and significance of the observed stress effects, we further evaluated the overall gene expression  
303 between the comparison groups using volcanic maps. We evaluated DEGs in the three comparison groups  
304 using volcanic maps (Figure 5D, E, F).

### 305 **3.3.3 KEGG and GO functional enrichment analysis of DEGs**

306 The biological functions of DEGs in the three comparison groups were elucidated by GO enrichment  
307 analysis under Cr stress. In the Cr0 vs Cr7 comparison group, DEGs were significantly enriched in  
308 DNA-binding transcription factor activity and transcription regulator activity. Participate in the regulation  
309 of RNA biosynthetic process, regulation of transcription, DNA-templated, and an anchored component of  
310 membrane DEGs were mainly significantly enriched in the Cr0 vs Cr14 comparison group. With the  
311 extension of Cr stress time, The functional pathways significantly enriched in the Cr0 vs Cr21 comparison  
312 group mainly include aerobic electron transport chain, cytoplasmic translation, inner mitochondrial  
313 membrane protein complex, NADH dehydrogenase complex, and respiratory chain complex (Figure 5J, K,  
314 L; Table S9).

315 KEGG functional pathway enrichment analysis is the primary database for identifying biological  
316 pathways between comparison groups. Firstly, the DEGs of *C. indica* roots under different Cr treatments  
317 were retrieved and annotated, the top 20 metabolic pathways with the highest enrichment levels were  
318 selected, and the enrichment analysis results were displayed with a bubble diagram. In the Cr0 vs Cr7  
319 comparison group, upregulated DEGs are mainly involved in Galactose metabolism, and the DEGs  
320 involved in Phenylpropanoid biosynthesis are primarily enriched in the Cr0 vs Cr14 comparison group.  
321 With the extension of Cr stress time, The significantly enriched functional pathways in the Cr0 vs Cr21  
322 comparison group mainly included Ribosome, Oxidative phosphorylation, Glutathione metabolism, and  
323 Isoquinoline alkaloid biosynthesis. It is worth noting that Starch and sucrose metabolism, MAPK signaling  
324 pathway-plant, and Plant hormone signal transduction were significantly enriched in Cr7 and Cr14.  
325 However, with the extension of Cr stress time, the enrichment degree of these three functional pathways  
326 decreased significantly (Figure 5G, H, I; Table S10). In summary, the results of this study showed that in  
327 the early stage of Cr stress, plants mainly respond to Cr stress through the regulation of carbohydrate  
328 metabolism, signaling, and transcription factors. With the extension of Cr stress time, Glutathione  
329 metabolism, Phenylpropanoid biosynthesis, and oxidative defense system were gradually enhanced in  
330 plants.

### 331 **3.3.4 Analysis of co-expression network of transcription factors and weighted genes**



332 The change of gene expression ultimately regulated the response mechanism of the *C. indica* root  
333 system to Cr stress. In this study, a total of 1619 transcription factors (TFs) were identified from 33  
334 transcription factor families. The top 5 families were MYB\_superfamily, AP2/ERF, bHLH, C2C2, and  
335 NAC (Figure 6A). Weighted gene co-expression network analysis (WGCNA) was used to investigate the  
336 relationship between genes and physiology and biochemistry in *C. indica*. Thirty-four gene modules were  
337 identified, including 26296 genes (Figure 6B, C). Among them, the central gene of the MEmidnightblue  
338 module was positively correlated with the content of photosynthetic pigments ( $P<0.001$ ), and through the  
339 network diagram and correlation heat map, it can be seen that DEGs regulating photosynthetic pigments  
340 were significantly up-regulated at the early stage of stress, but significantly down-regulated at the late stage  
341 of stress (Figure 6D, E). The central gene of the MEblack module was positively correlated with the degree  
342 of lipid peroxidation (MDA) in plants ( $P<0.001$ ), according to the screened central genes, lipid  
343 peroxidation in Cr7 and Cr14 groups was significantly enhanced but significantly weakened at the later  
344 stage of stress (Figure 6F, G). The central gene of the MEdarkolivegreen module was positively correlated  
345 with the activity of antioxidant enzymes (SOD) and the content of non-enzymatic antioxidant substances  
346 (GSH) in plants ( $P<0.001$ ), whose central gene was significantly enhanced in Cr7 and Cr21 groups (Figure  
347 6H, I). These results suggest that the core gene clusters screened by the gene visualization network in  
348 photosynthetic pigment biosynthesis, ROS oxidative stress, and antioxidant mechanisms may play a crucial  
349 role in *C. indica*.

350

## 351 4 Discussion

### 352 4.1 Physiological response changes of *C. indica* under Cr stress

353 Cr is almost not involved in any metabolic pathways in plants, but its toxicity will hinder and affect  
354 plant growth and development's physiological and biochemical processes (Mumtaz et al., 2022). Among  
355 them, changes in plant physiological characteristics are usually related to homeostasis and stress strategies  
356 (Xu et al., 2022). Plants can enhance their tolerance to heavy metals through their antioxidant mechanisms,  
357 energy metabolism, and hormone transduction processes (Pan et al., 2021). This study showed that after *C.*  
358 *indica* was exposed to Cr stress, the contents of carotenoid and chlorophyll in leaves were significantly  
359 reduced, and plant growth was significantly inhibited (Figure 1B, E). This is in contrast to previous studies  
360 in *Solanum lycopersicum L.*(Anastasis et al., 2021), *rice* (Yu et al., 2018), and *cauliflower* (Ahmad et al.,  
361 2020), indicating that plant photosynthesis may be interfered with by Cr stress. Meanwhile, in this study,  
362 the central gene screened by WGCNA in the MEmidnightblue module was significantly positively  
363 correlated with the content of photosynthetic pigments. However, its gene expression was significantly  
364 down-regulated with the extension of stress time (Figure 6D, E), which may explain why photosynthetic  
365 pigments decreased during stress. Plants can activate endogenous defense mechanisms in response to  
366 ROS-induced oxidative stress. The defense system is mainly composed of antioxidant enzymes and  
367 chelates, such as SOD, APX, and POD, which can scavenge free radicals and neutralize intermediates with  
368 oxidative toxicity to maintain plants' homeostasis, thus reducing oxidative damage in plant cells (Chen et  
369 al., 2022). In this study, it was observed that the activity of antioxidant enzymes (SOD, APX, and POD)  
370 and the contents of GSH and soluble sugar increased significantly with the extension of Cr stress time,  
371 which was consistent with the results of previous studies. Among them, soluble sugar could not only serve  
372 as energy storage substances for plants but also as signal transduction and osmotic regulation substances,  
373 playing a pivotal role in plant growth and development and stress response (Wei et al., 2019). GSH is a  
374 widely recognized essential plant metabolite and functions as an antioxidant and detoxifier, a precursor to  
375 phytochelatin. It can bind with Cr, Pb, and other heavy metals, significantly reduce its mobility and

376 bioavailability, and greatly enhance plant tolerance to heavy metals (Mumtaz et al., 2022; Meng et al.,  
377 2022). It should be noted that the oxidative stress system of *C. indica* does not activate to the highest level  
378 at the initial stage of stress but gradually strengthens with the extension of stress time.

#### 379 4.2 Transcriptional metabolic response of *C. indica* to Cr stress under time series

380 In Cr stressed environment, plant roots can jointly resist heavy metal poisoning by changing the  
381 content of their metabolites and gene expression of critical metabolic pathways (Wang et al., 2022). This  
382 study revealed the molecular response mechanism of *C. indica* under Cr stress under time series through  
383 untargeted metabonomics studies combined with transcriptomic analysis. The results showed that DEGs  
384 involved in Galactose, Starch, and sucrose metabolism were significantly up-regulated in *C. indica* under  
385 short-term Cr stress, leading to a significant increase in carbohydrate content in *C. indica* (Figure 7A, B;  
386 Figure 3B). Many studies have shown that the upregulation of endoglucanase, EGLC, SUS, and  $\beta$ -amylase  
387 in the Starch and sucrose metabolism pathway will increase soluble sugar content in plants (Meng et al.,  
388 2022). This phenomenon is essential in plant growth, development, and signal transduction in response to  
389 Cr stress (Wang et al., 2021c). In addition, galactose metabolism is an essential intermediate process of the  
390 carbohydrate cycle in plants, providing precursors for glucose metabolism and energy support for metabolic  
391 processes under stress, thus helping plants maintain nutritional balance in harsh environments (Yu et al.,  
392 2023). Therefore, in the early stage of Cr stress, the rich carbohydrate metabolism process in *C. indica* may  
393 help to enhance plant tolerance to Cr for a short period.

394 In this study, in the middle stage of Cr stress, it was also found that plant hormone signal transduction  
395 and MAPK signaling pathway were significantly enhanced in *C. indica* (Figure 7C, D). Generally speaking,  
396 plant hormones are vital regulatory factors mediating stress response, which can rapidly activate stress  
397 response mechanisms in various organelles, thus reducing oxidative damage in plants (Meng et al., 2022;  
398 Mittler et al., 2022). In order to induce the expression of various transport factors and the production of the  
399 Cr(VI) detoxification peptide chain, Enzymes involved in metabolic pathways in plants are activated in  
400 response to stress signals (Mumtaz et al., 2022). Heavy metals promote the expression of TFs and  
401 stress-responsive genes in plants and activate various signaling pathways, including MAPK signaling and  
402 hormone signaling (Kumar et al., 2020; Star et al., 2019). In existing studies, Kumar et al. (2015) used  
403 *Arabidopsis thaliana* to reveal the activation pathway of MAPK signaling pathway in plants under heavy  
404 metal stress, mainly including ROS accumulation and changes in the antioxidant system. This study found  
405 that flg22 and Abscisic acid-related genes in the MAPK signaling pathway were significantly up-regulated  
406 in *C. indica* after the exogenous addition of Cr(VI) at the middle stage of stress. In auxin signal  
407 transduction, upregulation of ARF, which is a hub gene, in a high-Cr environment not only regulates the  
408 upregulation of downstream SAUR and GH3 to cope with adverse environmental conditions but also  
409 regulates the direction of plant growth factors by binding to Aux/IAA repressor proteins (Figure 7C;  
410 Guilfoyle et al., 2007). This indicates that under Cr stress, with the extension of time, the growth strategy of  
411 *C. indica* changes, and the rapid root growth is conducive to the absorption of soil nutrients by plants, thus  
412 conducive to the survival of plants in the stressed environment. Studies have shown that ABA is closely  
413 related to the signal transduction of plant stress resistance (Cutler et al., 2010). The results showed that in  
414 the middle stage of Cr stress, ABA receptor PYR/PYL-related genes were up-regulated and inhibited  
415 downstream PP2C and SnPK2-related genes, thus activating ABF binding factors and enhancing the ABA  
416 signal transduction process. In the JA signaling pathway, Verma et al. (2020) used transcriptomics to reveal  
417 the signal regulation of MYC2 in *Arabidopsis thaliana*, and the results showed that MYC2 mainly mediated  
418 the biosynthesis of proline. Meanwhile, in the salicylic acid signaling pathway, the results of Zhang et al.  
419 (2022b) showed that the NPR1 protein involved in REDOX regulation was mainly mediated by salicylic

420 acid. Therefore, we speculate that IAA, ABA, jasmonic acid, and salicylic acid play a crucial role in  
421 enhancing Cr tolerance in plants.

422 The plant can regulate heavy metals' transport through cell wall fixation, metal chelation, and vacuolar  
423 compartments. Among them, the absorption of heavy metals is mainly concentrated in the plant root cell  
424 wall, which can prevent external pollutants from entering the cell interior (Yuan et al., 2022a). *Solanum*  
425 *nigrum* L.(Wang et al., 2022), *Celosia argentea* Linn (Yu et al., 2023), and *Sedum alfredii* (Ge et al., 2023),  
426 Studies on the distribution of heavy metals that the root cell wall is the leading site for binding heavy  
427 metals and plays a crucial role in plant response to Cr stress. The present study showed that after the  
428 exogenous addition of Cr(VI), DEGs involved in the regulation of phenylpropanoid biosynthesis was  
429 significantly up-regulated at the later stage of stress with the extension of stress time (Figure 5H, I; Figure  
430 7E). Therefore, we speculated that *C. indica*, under long-term Cr stress, may activate the phenylpropanoid  
431 biosynthesis pathway in plants due to the increased accumulation of HMC in the roots, affecting the  
432 synthesis of coumarin and lignans, thus reducing the mobility and bioavailability of Cr. This can enhance  
433 the tolerance of *C. indica* to HMC (Sharma et al., 2020; Xian et al., 2020). Wang et al. (2021b) also showed  
434 in recent studies that plants under heavy metal stress could enhance their binding ability with heavy metals  
435 by inducing their cell wall metabolism and reshaping their structure to enhance their tolerance to heavy  
436 metals. In addition, plants can jointly regulate the accumulation and transport of heavy metals by increasing  
437 cellulose and pectin contents and xylem cell wall thickness to alleviate heavy metals' toxic effects on plants  
438 (Guo et al., 2021a). Phenylpropanes (Figure S1) and amino acid (Phenylalanine) contents (Figure 3C, D)  
439 and the Phenylalanine metabolism pathway (Figure 4C, D) were significantly up-regulated in late Cr stress.  
440 Among them, phenylalanine is catalyzed and oxidized to tyrosine by phenylalanine hydroxylase, which,  
441 together with tyrosine, synthesizes important hormone substances and participates in glucose metabolism  
442 and lipid metabolism (Adams et al., 2019). Moreover, it can be converted into phenylpropane metabolites  
443 in secondary metabolic biosynthesis, including lignin and flavonoids, which greatly enhance the tolerance  
444 of plants to heavy metals (Yuan et al., 2022a). In addition, the enhancement of the Phenylalanine  
445 metabolism pathway is consistent with transcriptome results, suggesting that cell wall metabolism-related  
446 pathways of *C. indica* may play a crucial role in plant response to heavy metal stress under prolonged  
447 heavy metal stress (Yuan et al., 2022a).

448 GSH is a plant antioxidant, mainly in the form of reduced glutathione (GSH) and oxidized glutathione  
449 (GSSG) in plants. It is involved primarily in the removal of ROS in plants and the chelation of heavy  
450 metals and plays an essential role in the stress resistance of plant cells (Yu et al., 2023). This study showed  
451 that DEGs involved in regulating GSH metabolism in *C. indica* roots were significantly up-regulated under  
452 two treatment times of Cr14 and Cr21 (Figure 5H, I; Figure 7F). This may be because plants exposed to  
453 heavy metal stress for a long time can produce a large amount of ROS. However, excessive ROS  
454 accumulation will eventually lead to lipid peroxidation of the cell membrane and damage its function of the  
455 cell membrane. Therefore, genes that regulate GSH metabolism in plants are induced to be expressed in  
456 response to oxidative damage caused by stress (Mumtaz et al., 2022). However, some studies have shown  
457 that ROS in plants can be independently produced in different compartments and serve stress-sensing and  
458 signaling purposes in plants to regulate gene expression and induce stress recovery (Mittler et al., 2022). It  
459 is worth noting that GSH can not only capture and bind heavy metal ions attached to the enzyme protein  
460 sulfhydryl but also reduce them to acidic substances through the combination of sulfhydryl with free  
461 radicals in plants to accelerate the removal of free radicals, thus enhancing the tolerance of plants to heavy  
462 metals (Li et al., 2021). Meanwhile, Yu et al. (2023) revealed the detoxification mechanism of GSH in  
463 plants of *Celosia argentea* Linn under heavy metal stress through multi-omics analysis. The results showed

464 that GSH is a precursor to phytochelatin peptides (PCs) using a synthase to complex free HM ions in plant  
465 cells. This HM complex is then delivered to plant vacuoles via tonoplast membrane transporters for  
466 eventual detoxification. Hasanuzzaman et al. (2020) reported that plants' antioxidant content would  
467 increase significantly under oxidative stress, dramatically enhancing plants' stress resistance. In addition,  
468 WGCNA showed that the central gene of the MEdarkolivegreen module was significantly positively  
469 correlated with the GSH content in plants ( $P < 0.001$ ), and its expression was significantly increased in the  
470 Cr21 group (Figure 6H, I). This is similar to the gene expression results of the GSH metabolic pathway in  
471 *Morus alba* L. and Pepper (Guo et al., 2021b; Mumtaz et al., 2022). Key functional genes involved in  
472 glutathione S-transferase and Glutathione metabolism were significantly up-regulated under heavy metal  
473 stress, which greatly enhanced plant stress resistance.

474 The contents of amino acids (L-Glutamate, Glutamine, and Glycine) and flavonoid metabolites at the  
475 late stage of Cr stress (Figure 3D; Figure S1) and glutamate metabolism (Figure 4D) were significantly  
476 up-regulated. In plants, amino acids can effectively chelate metal ions in the cytoplasm to reduce the toxic  
477 effect of heavy metals on plants (Singh et al., 2016). L-Glutamate is an intermediate for the biosynthesis of  
478 oxidized amino acids, which plants can use for secondary metabolisms, such as the biosynthesis of  
479 glutamine, proline, and lysine (Yuan et al., 2022b). Glutamine is an essential precursor of glutathione  
480 biosynthesis in plants. Glycine is an antioxidant involved in heavy metal chelation in plants, and the  
481 presence of these metabolites plays a crucial role in plant survival and stress resistance (Feng et al., 2021).  
482 In addition, proline is not only an ideal osmotic regulator in plants but also a protective substance for  
483 enzymes in cell membranes and plants, as well as a free radical scavenger (Meng et al., 2022), which can  
484 protect the growth of *C. indica* under heavy metal stress. Mwamba et al. (2022) revealed the adaptive  
485 mechanism of *Brassic napus* to heavy metal stress through metabolomics analysis. The results showed  
486 that phenolic compounds were involved in response to heavy metal stress, among which flavonoids were  
487 significantly induced, and indicated that the antioxidant mechanism was the final response strategy to  
488 heavy metal stress. In conclusion, *C. indica* can resist Cr stress mainly through carbohydrate metabolism  
489 (galactose, Starch, and sucrose metabolism) in the early stage of Cr stress (Cr7). With the extension of Cr  
490 stress time, in the middle stage of stress (Cr14), plants mainly use plant hormone signal transduction and  
491 MAPK signaling pathway to regulate their stress response system to cope with Cr stress jointly. In  
492 anaphase of stress (Cr21), *C. indica* mainly activates its Glutathione metabolism and Phenylpropanoid The  
493 expression of genes related to biosynthesis and the accumulation of metabolites (phenylpropanoids,  
494 phenylalanine, flavonoids, and L-Glutamate) can jointly resist the toxicity of Cr through endogenous and  
495 exogenous molecular response defense mechanisms, thus enhancing the tolerance of plants to Cr stress.

496

## 497 5. Conclusions

498 This study showed that *C. indica* showed corresponding changes in plant growth and physiological  
499 metabolite levels under Cr stress at different exposure times. Due to the toxicity of Cr itself, plant growth  
500 was significantly inhibited, the biosynthesis of photosynthetic pigments was damaged, and the expression  
501 levels of enzymes were promoted. Non-enzymes-promoted antioxidants in plants were reduced  
502 considerably. In addition, this study revealed the molecular response mechanism of *C. indica* under  
503 different stress times through transcriptome and metabolomics analysis. The results showed that *C. indica*  
504 maintained its energy supply through Galactose, Starch, and sucrose metabolism in the early stages of  
505 stress (Cr7), ensuring the regular operation of liver metabolism and resisting the toxicity of Cr. With the  
506 extension of stress time, the plant hormone signal transduction and MAPK signaling pathway processes of  
507 *C. indica* during the middle stage of stress (Cr14) are affected, thus altering the plant growth strategy.

508 Finally, in the later stages of stress (Cr<sup>2+</sup>), *C. indica* mainly activates the expression of Glutathione  
509 metabolism and Phenylpropanoid biosynthesis genes and the accumulation of antioxidant substances  
510 (phenylalanine, flavonoids, and L-Glutamate). Both endogenous and exogenous defense mechanisms can  
511 jointly resist Cr poisoning, enhancing the tolerance of *C. indica* to Cr. The results of this study are expected  
512 to provide new insights into the growth, physiological and molecular response mechanisms of wetland  
513 plants under Cr stress.

514

#### 515 **Declaration of competing interest**

516 The authors declare that they have no known competing financial interests or personal relationships that  
517 could have appeared to influence the work reported in this paper.

518

#### 519 **Acknowledgments**

520 This study is financially supported by the National Natural Science Foundation of China (31560107), and  
521 by the Science and Technology Support Project of Guizhou province, China (Guizhou Branch Support  
522 [2018]2807).

523

#### 524 **CORRESPONDING AUTHOR**

---

##### 525 **Zhu Sixi**

526 College of Eco-environment Engineering, Guizhou Minzu University; Guiyang 550025, China.

527 e-mail: zhusixi2011@163.com

528

529

#### 530 **References:**

531 Adams, Z.P., Ehrling, J., Edwards, R., 2019. The regulatory role of shikimate in plant phenylalanine  
532 metabolism. *J Theor Biol.* 462, 158-170.

533 Ahmad, R., Ali, S., Rizwan, M., et al., 2020. Hydrogen sulfide alleviates chromium stress on  
534 cauliflower by restricting its uptake and enhancing antioxidative system. *Physiol. Plant.* 168, 289-300.

535 Anastasis, C., Egli, C.G., Andreas, M.Z., 2021. Uptake of hexavalent chromium by tomato (*Solanum*  
536 *lycopersicum L.*) plants and mediated effects on their physiology and productivity, along with fruit quality  
537 and safety. *Environmental and Experimental Botany.* 189, 104564.

538 Ao, M., Chen, X.T., Deng, T.H.B., et al., 2022. Chromium biogeochemical behaviour in soil-plant  
539 systems and remediation strategies: A critical review. *Journal of Hazardous Materials.* 424, 127233.

540 Arun, K.S., Carlos, C., Herminia, L.T., et al., 2005., Chromium toxicity in plants. *Environment*  
541 *International*, 31, 739-753.

542 Ashraf, S., Ali, Q., Zahir, Z.A., et al., 2019. Phytoremediation: environmentally sustainable way for  
543 reclamation of heavy metal polluted soils. *Ecotoxicol. Environ. Saf.* 174, 714-727.

544 Bao, S.D., 2000. *Analytical Methods of Soil Agro-chemistry.* China agriculture press, Beijing (in  
545 Chinese).

546 Bates, L.S., Waldren, R.P., Teare, I.D., 1973. Rapid determination of free proline for water-stress  
547 studies. *Plant Soil.* 39.

548 Chen, H., Jin, J., Hu, S., Shen, L., Zhang, P., Li, Z., Fang, Z., Liu, H., 2022. Metabolomics and  
549 proteomics reveal the toxicological mechanisms of florfenicol stress on wheat (*Triticum aestivum L.*)  
550 seedlings. *J Hazard Mater.* 443, 130264.

551 Cutler, S.R., Rodriguez, P.L., Finkelstein, R.R., Abrams, S.R., 2010. Abscisic acid: emergence of a  
552 core signaling network. *Annu. Rev. Plant Biol.* 61, 651-679.

- 553 Dong, X.X., Yang, F., Yang, S.P., et al., 2019. Subcellular distribution and tolerance of cadmium in  
554 *Canna indica* L. *Ecotoxicology and Environmental Safety*. 185, 109692.
- 555 Fan, X., Chang, W., Feng, F., et al., 2018. Responses of photosynthesis-related parameters and  
556 chloroplast ultrastructure to atrazine in alfalfa (*Medicago sativa* L.) inoculated with arbuscular mycorrhizal  
557 fungi. *Ecotoxicol. Environ. Saf.* 166, 102-108.
- 558 Feng, Z., Ji, S.Y., Ping, J.F., Cui, D., 2021. Recent advances in metabolomics for studying heavy metal  
559 stress in plants. *TrAC, Trends Anal. Chem.* 116402.
- 560 Gao J., S.Q., Cao C., et al., 2006. *Experimental Guidance for Plant Physiology*, first ed. Beijing.
- 561 Ge, J., Tao, J., Zhao, J., Wu, Z., Zhang, H., Gao, Y., Tian, S., Xie, R., Xu, S., Lu, L., 2022.  
562 Transcriptome analysis reveals candidate genes involved in multiple heavy metal tolerance in  
563 hyperaccumulator *Sedum alfredii*. *Ecotoxicol Environ Saf.* 241, 113795.
- 564 Guilfoyle TJ, Hagen G., 2007. Auxin response factors. *Curr Opin Plant Biol.* 10, 453-60.
- 565 Guo, X., Luo, J., Du, Y., Li, J., Liu, Y., Liang, Y., Li, T., 2021a. Coordination between root cell wall  
566 thickening and pectin modification is involved in cadmium accumulation in *Sedum alfredii*. *Environ. Pollut.*  
567 268, 115665.
- 568 Guo, Z.H., Zeng, P., Xiao, X.Y., Peng, C., 2021b. Physiological, anatomical, and transcriptional  
569 responses of mulberry (*Morus alba* L.) to Cd stress in contaminated soil. *Environ. Pollut.* 284, 117387.
- 570 Hakan, T., Mustafa, Y., 2021. Proteomic analysis reveals the role of exogenous cysteine in alleviating  
571 chromium stress in maize seedlings. *Ecotoxicology and Environmental Safety*. 209, 111784.
- 572 Hasanuzzaman, M., Bhuyan, M.H.M.B., Zulficar, F., Raza, A., Mohsin, S.M., Al Mahmud, J., Fujita,  
573 M., Fotopoulos, V., 2020. Reactive Oxygen Species and Antioxidant Defense in Plants under Abiotic Stress:  
574 Revisiting the Crucial Role of a Universal Defense Regulator. *Antioxidants* 9, 681.
- 575 Helaoui, S., Boughattas, I., Hattab, S., et al., 2020. Physiological, biochemical and transcriptomic  
576 responses of *Medicago sativa* to nickel exposure. *Chemosphere* 249, 126121.
- 577 Ibarra, A.A.G., Wrobel, K., Barrientos, E.Y., et al., 2019. Impact of Cr(VI) on the oxidation of  
578 polyunsaturated fatty acids in *Helianthus annuus* roots studied by metabolomic tools. *Chemosphere.* 220,  
579 442-451.
- 580 Jia, H., Wang, X., Dou, Y., et al., 2016. Hydrogen sulfide-cysteine cycle system enhances cadmium  
581 tolerance through alleviating cadmium-induced oxidative stress and ion toxicity in *Arabidopsis* roots. *Sci.*  
582 *Rep.* 6, 39702.
- 583 Khan, K.Y., Ali, B., Stoffella, P.J., Cui, X., Yang, X., Guo, Y., 2020. Study amino acid contents, plant  
584 growth variables and cell ultrastructural changes induced by cadmium stress between two contrasting  
585 cadmium accumulating cultivars of *Brassica rapa* ssp. *chinensis* L. (pak choi). *Ecotoxicol. Environ. Saf.*  
586 200, 110748.
- 587 Kumar, S., Trivedi, P.K., 2015. Heavy metal stress signaling in plants. In: *Plant Metal Interaction:*  
588 *Emerging Remediation Techniques*, pp. 585-603.
- 589 Kumar, K., Raina, S.K., Sultan, S.M., 2020. *Arabidopsis* MAPK signaling pathways and their cross  
590 talks in abiotic stress response. *J. Plant Biochem. Biotechnol.* 29, 700-714.
- 591 Liu, Y., Guo, P.Y., Liao, J.H., 2011. Resistant reaction of *Canna indica* and *Scindapsus aureum* to  
592 Cr(VI) stress in purifying eutrophication water. *Journal of Zhejiang University (Science Edition)*. 38,  
593 78-84.
- 594 Li, C.H., Zheng, C., Fu, H.X., Zhai, S.H., Hu, F., Naveed, S., Zhang, C.H., Ge, Y., 2021. Contrasting  
595 detoxification mechanisms of *Chlamydomonas reinhardtii* under Cd and Pb stress. *Chemosphere* 274,  
596 129771.

- 597 Mbonankira, J.E., Coq, S., Vromman, D., et al., 2015. Catalase and ascorbate peroxidase activities are  
598 not directly involved in the silicon-mediated alleviation of ferrous iron toxicity in rice. *Plant Nutr. Soil*  
599 *Sci.* 178, 477-485.
- 600 Mumtaz, M.A., Hao, Y., Mehmood, S., Shu, H., Zhou, Y., Jin, W., Chen, C., Li, L., Altaf, M.A., Wang,  
601 Z., 2022. Physiological and Transcriptomic Analysis provide Molecular Insight into 24-Epibrassinolide  
602 mediated Cr(VI)-Toxicity Tolerance in *Pepper* Plants. *Environ Pollut.* 306, 119375.
- 603 Meng, L., Yang, Y., Ma, Z., Jiang, J., Zhang, X., Chen, Z., Cui, G., Yin, X., 2022. Integrated  
604 physiological, transcriptomic and metabolomic analysis of the response of *Trifolium pratense L.* to Pb  
605 toxicity. *J. Hazard. Mater.* 15, 436, 129128.
- 606 Mittler, R., Zandalinas, S.I., Fichman, Y., Van, B.F., 2022. Reactive oxygen species signalling in plant  
607 stress responses. *Nat Rev Mol Cell Biol.* 23, 663-679.
- 608 Mwamba TM, Islam F, Ali B, Lwalaba JLW, Gill RA, Zhang F, Farooq MA, Ali S, Ulhassan Z, Huang  
609 Q, Zhou W, Wang J. Comparative metabolomic responses of low- and high-cadmium accumulating  
610 genotypes reveal the cadmium adaptive mechanism in *Brassica napus*. *Chemosphere.* 2020  
611 Jul;250:126308.
- 612 Pan, C.L., Lu, H.L., Yang, C.Y., Wang, L., Chen, J.M., Yan, C.L., 2021. Comparative transcriptome  
613 analysis reveals different functions of *Kandelia obovata* superoxide dismutases in regulation of cadmium  
614 translocation. *Sci. Total Environ.* 771, 144922.
- 615 Riti, T.K., Manar, F.B.M., Pravej, A., et al., 2022. Accumulation of chromium in plants and its  
616 repercussion in animals and humans. *Environmental Pollution.* 301, 119044.
- 617 Roy, S.K., Cho, S.W., Kwon, S.J., et al., 2016. Morpho-physiological and proteome level responses to  
618 cadmium stress in sorghum. *PLoS One* 11, 1-27.
- 619 Saleem, M.H., Ali, S., Rehman, M., Rana, M.S., Rizwan, M., Kamran, M., Imran, M., Riaz, M.,  
620 Soliman, M.H., Elkelish, A., Liu, L., 2020. Influence of phosphorus on copper phytoextraction via  
621 modulating cellular organelles in two jute (*Corchorus capsularis L.*) varieties grown in a copper mining  
622 soil of Hubei Province, China. *Chemosphere* 248, 126032.
- 623 Sharma, A., Kapoor, D., Wang, J., Shahzad, B., Kumar, V., Bali, A.S., Jasrotia, S., Zheng, B., Yuan, H.,  
624 Yan, D., 2020. Chromium bioaccumulation and its impacts on plants: an overview. *Plants* 9, 100.
- 625 Singh, S., Parihar, P., Singh, R., Singh, V.P., Prasad, S.M., 2016. Heavy Metal Tolerance in Plants:  
626 Role of Transcriptomics, Proteomics, Metabolomics, and Ionomics. *Front. Plant Sci.* 6.
- 627 Singh, S., Sunil Kumar Naik, T.S., Vishakha, C., et al., 2022. Ecological effects, remediation,  
628 distribution, and sensing techniques of chromium. *Chemosphere.* 307, 135804.
- 629 Sinha, V., Pakshirajan, K., Chaturvedi, R., 2018. Chromium tolerance, bioaccumulation and  
630 localization in plants: an overview. *Environ. Manag.* 206, 715-730.
- 631 Su, Z., Xiao, Q., Shen, J., et al., 2021. Metabolomics analysis of litchi leaves during floral induction  
632 reveals metabolic improvement by stem girdling. *Molecules (Basel, Switzerland)* 26.
- 633 Sytar, O., Kumari, P., Yadav, S., Brestic, M., Rastogi, A., 2019. Phytohormone priming: regulator for  
634 heavy metal stress in plants. *J. Plant Growth Regul.* 38, 739-752.
- 635 Uchimiya, M., Bannon, D., Nakanishi, H., et al., 2020. Chemical speciation, plant uptake, and toxicity  
636 of heavy metals in agricultural soils. *J. Agr. Food Chem.* 68, 12856-12869.
- 637 Verma, D., Jalmi, S.K., Bhagat, P.K., Verma, N., Sinha, A.K., 2020. A bHLH transcription factor,  
638 MYC2, imparts salt intolerance by regulating proline biosynthesis in *Arabidopsis*. *FEBS J.* 287, 2560-2576.
- 639 Vibha, S., Kannan, P., Rakhi, C., 2018. Chromium tolerance, bioaccumulation and localization in  
640 plants: An overview. *Journal of Environmental Management.* 206, 715-730.

- 641 Wang A.Y., Huang, S.S., Zhong, G.F., et al., 2012. Effect of Cr (VI) stress on growth of three herbaceous  
642 plant and their Uptake. *Environment Science*. 33, 2018-2037.
- 643 Wang, B.C., Zhu, S.X., Li, W.J., et al., 2021a. Effects of chromium stress on the rhizosphere microbial  
644 community composition of *Cyperus alternifolius*. *Ecotoxicology and Environmental Safety*, 218, 112253.
- 645 Wang, J., Chen, X., Chu, S., Hayat, K., Chi, Y., Zhi, Y., Zhang, D., Zhou, P., 2021b. Influence of Cd  
646 toxicity on subcellular distribution, chemical forms, and physiological responses of cell wall components  
647 towards short-term Cd stress in *Solanum nigrum*. *Environ. Sci. Pollut. Res.* 28, 13955-13969.
- 648 Wang, Y., Meng, Y., Mu, S., Yan, D., Xu, X., Zhang, L., Xu, B., 2021c. Changes in phenotype and  
649 gene expression under lead stress revealed key genetic responses to lead tolerance in *Medicago sativa* L.  
650 *Gene* 791, 145714.
- 651 Wang, J., Chen, X., Chu, S., You, Y., Chi, Y., Wang, R., Yang, X., Hayat, K., Zhang, D., Zhou, P., 2022.  
652 Comparative cytology combined with transcriptomic and metabolomic analyses of *Solanum nigrum* L. in  
653 response to Cd toxicity. *J. Hazard. Mater.* 423, 127168.
- 654 Wei, T.L., Wang, Y., Xie, Z.Z., Guo, D.Y., Chen, C.W., Fan, Q.J., Deng, X.D., Liu, J.H., 2019.  
655 Enhanced ROS scavenging and sugar accumulation contribute to drought tolerance of naturally occurring  
656 autotetraploids in *Poncirus trifoliata*. *Plant Biotechnol. J.* 17, 1394-1407.
- 657 Xian, J.P., Wang, Y., Niu, K.J., Ma, H.L., Ma, X., 2020. Transcriptional regulation and expression  
658 network responding to cadmium stress in a Cd-tolerant perennial grass *Poa Pratensis*. *Chemosphere* 250,  
659 126158.
- 660 Xiang, H.M., Lan, N., Wang, F.G., Zhao, B.L., Wei, H., Zhang, J.E., 2022. An effective planting model  
661 to decrease cadmium accumulation in rice grain and plant: Intercropping rice with wetland plants.  
662 *Pedosphere*. 32.
- 663 Xing, S.P., Chen, B.D., Hao, Z.P., et al., 2021. The Role of Rhizosphere Microorganisms in Enhancing  
664 Chromium Tolerance of Host Plants. *Asian Journal of Ecotoxicology*. 16, 2-14.
- 665 Xu, C.C., Li, Z.Y., Wang, J.B., 2022. Temporal and tissue-specific transcriptome analyses reveal  
666 mechanistic insights into the *Solidago canadensis* response to cadmium contamination. *Chemosphere*. 292,  
667 133501.
- 668 Yin, X., He, T., Yi, K., et al., 2021. Comprehensive evaluation of candidate reference genes for  
669 quantitative real-time PCR-based analysis in Caucasian clover. *Sci. Rep.* 11, 3269.
- 670 Yu, X.Z., Feng, Y.X., Liang, Y.P., 2018. Kinetics of phyto-accumulation of hexavalent and trivalent  
671 chromium in rice seedlings. *Int. Biodeter. Biodegra.* 128, 72-77.
- 672 Yu, G., Ullah, H., Wang, X., Liu, J., Chen, B., Jiang, P., Lin, H., Sunahara, G.I., You, S., Zhang, X.,  
673 Shahab, A., 2023. Integrated transcriptome and metabolome analysis reveals the mechanism of tolerance to  
674 manganese and cadmium toxicity in the Mn/Cd hyperaccumulator *Celosia argentea* Linn. *J. Hazard. Mater.*  
675 443, 130206.
- 676 Yuan, Y., Imtiaz, M., Rizwan, M., Dai, Z., Hossain, M.M., Zhang, Y., Huang, H., Tu, S., 2022a. The  
677 role and its transcriptome mechanisms of cell wall polysaccharides in vanadium detoxication of rice. *J*  
678 *Hazard Mater.* 425, 127966.
- 679 Yuan, J., Liu, R., Sheng, S., Fu, H., Wang, X., 2022b. Untargeted LC-MS/MS-Based Metabolomic  
680 Profiling for the Edible and Medicinal Plant *Salvia miltiorrhiza* Under Different Levels of Cadmium Stress.  
681 *Front Plant Sci.* 28, 889370.
- 682 Zhang, C.X., Chen, W.F., 2012. Stress responses of *Canna indica* to Cd and its accumulation of Cd.  
683 *Chinese Journal of Plant Ecology*. 6, 690-696.
- 684 Zhang, X.M., Wang, T.T., Xu, Z.J., et al., 2020. Effect of heavy metals in mixed domestic-industrial



685 wastewater onperformance of recirculating standing hybrid constructed wetlands (RSHCWs) and their  
686 removal. Chemical Engineering Journal. 379, 122363.

687 Zhang, Z., Wen, Z.F., Zhao, J.X., 2022a. Tolerance of *leersia hexandra swartz* to heavy metal  
688 chromium stress and Its physiological and biochemical response. Modern Chemical Research. 5, 36-38.

689 Zhang F, Lu F, Wang Y, Zhang Z, Wang J, Zhang K, Wu H, Zou J, Duan Y, Ke F, Zhu K., 2022b.  
690 Combined transcriptomic and physiological metabolomic analyses elucidate key biological pathways in the  
691 response of two sorghum genotypes to salinity stress. Front Plant Sci. 13, 880373.

692 Zhao, B., Zhu, S.X., Xu, C., 2017. Response of physiological and ecological characteristics of *Canna*  
693 *indica* under Cr(VI) stress. Science Technology and Engineering, 2017, 17, 44-49.

694 Zhong, M.Y., Zhang, X.Q., Yang, X.Y., et al., 2019. Recent advances in plant response to chromium s  
695 tress. Pratacultural Science. 36, 1962-1975.

Fig. 1 Effects of Cr stress on soil physicochemical properties (pH, EC, and SOM) and physiological and biochemical indexes of *C. indica* (Freshweight, Carotenoid, Chlorophyll, SOD, APX, POD, GSH, MDA, ROS, Soluble sugar, Chlorophyll a, and Chlorophyll b). Data within the same followed by a string of the same lowercase letters are not significantly different ( $P > 0.05$ ). At the same time, a series of other letters show a significant difference ( $P < 0.05$ ).

Fig. 2 PCA and PLS-DA plot metabolic profiles in *C. indica* root among different groups in both the positive ion (A, B) and negative ion (C, D) modes under Cr treatments, respectively.

Fig. 3 Quality control of Metabolomics data and Changes in DEM expression. (A) Compare the Veen graph of the number of DEMs in groups pairwise. The overlap represents the number of metabolites common to each comparison group, and the non-overlap represents the number of metabolites unique to the comparison group, (B) Heatmap showing the results of the clustering analysis of DEMs

Fig. 4 Enrichment analysis of KEGG functional pathways. (A) Top 20 functional pathways for metabolite enrichment. From left to right, the number of metabolites in the column was ranked from high to low. The higher the column, the more metabolites are involved in this pathway among the identified metabolites. (B, C, D) The top 20 pathways of the significance of the up-regulated and down-regulated DEMs on KEGG. The X-axis represented the rich factor, and the Y-axis represented the pathway's name. The bubble size represents the number of DEMs involved. The bubbles color indicates the enrichment degree of the path.

Fig. 5 Changes in DEG expression, (A) Up-regulation and down-regulation of DEGs, red represents up-regulation, blue represents down-regulation. (B, C)Veen plot of pairwise comparison of the group's number of up-regulation and down-regulation DEGs. The overlap means the number of metabolites common to each comparison group, and the non-overlap represents the number of metabolites unique to the comparison group. (D, E, F) Volcano plots of DEGs up-regulation and down-regulation (G, H, I) The top 20 pathways of the significance of the up-regulated and down-regulated DEGs on KEGG. The X-axis represented the rich factor, and the Y-axis represented the pathway's name. The bubble size represents the number of DEGs involved. The bubbles color indicates the enrichment degree of the path (J, K, L) GO pathway enrichment analysis.

Fig. 6 Results of TF and WGCNA. (A) The number of top 20 TFs. (B) Hierarchical clustering tree showing coexpression modules identified by WGCNA. (C) Module sample association relationships. (D, E) midnight blue module central gene symbiosis network map and clustering heat map, (F, G) black module major gene symbiosis network and clustering heat map, (H, I) Symbiotic network map and clustering heat map of dark olive-green module center gene.

Fig. 7 Changes of main metabolic pathways in *C. indica* after Cr stress. Based on the data generated by the KEGG database and with some modifications, the path was established. Red and blue indicate up-regulation and down-regulation, respectively, while gray indicates no significant change.

**Fig. 1**

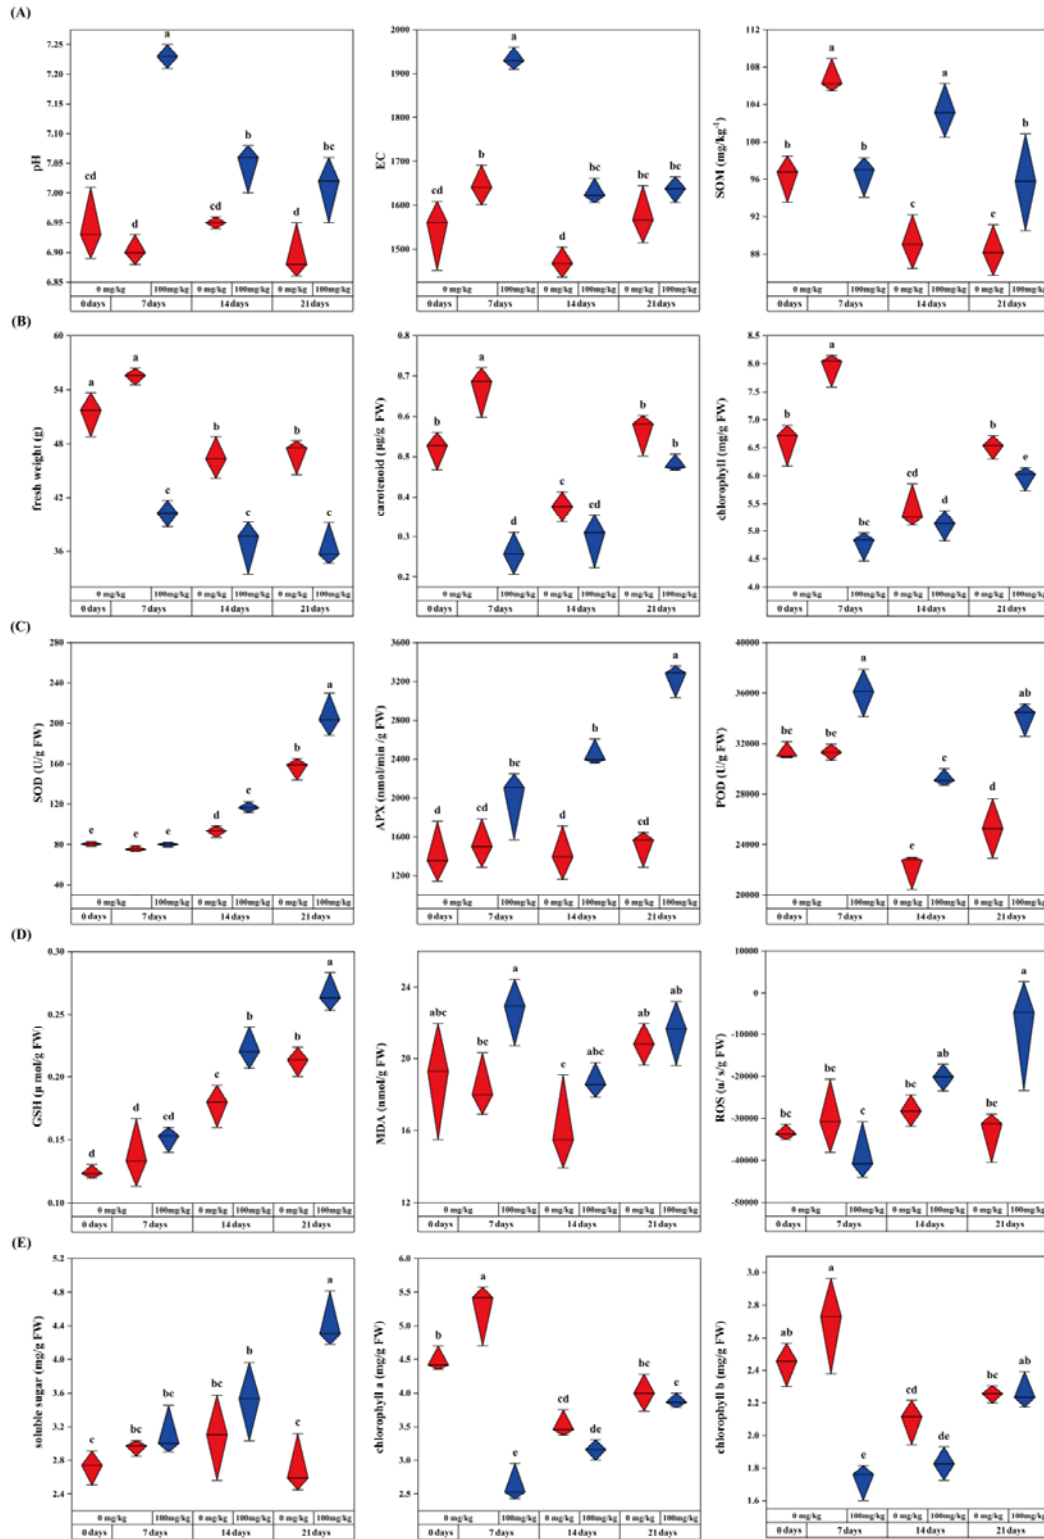

Fig. 2

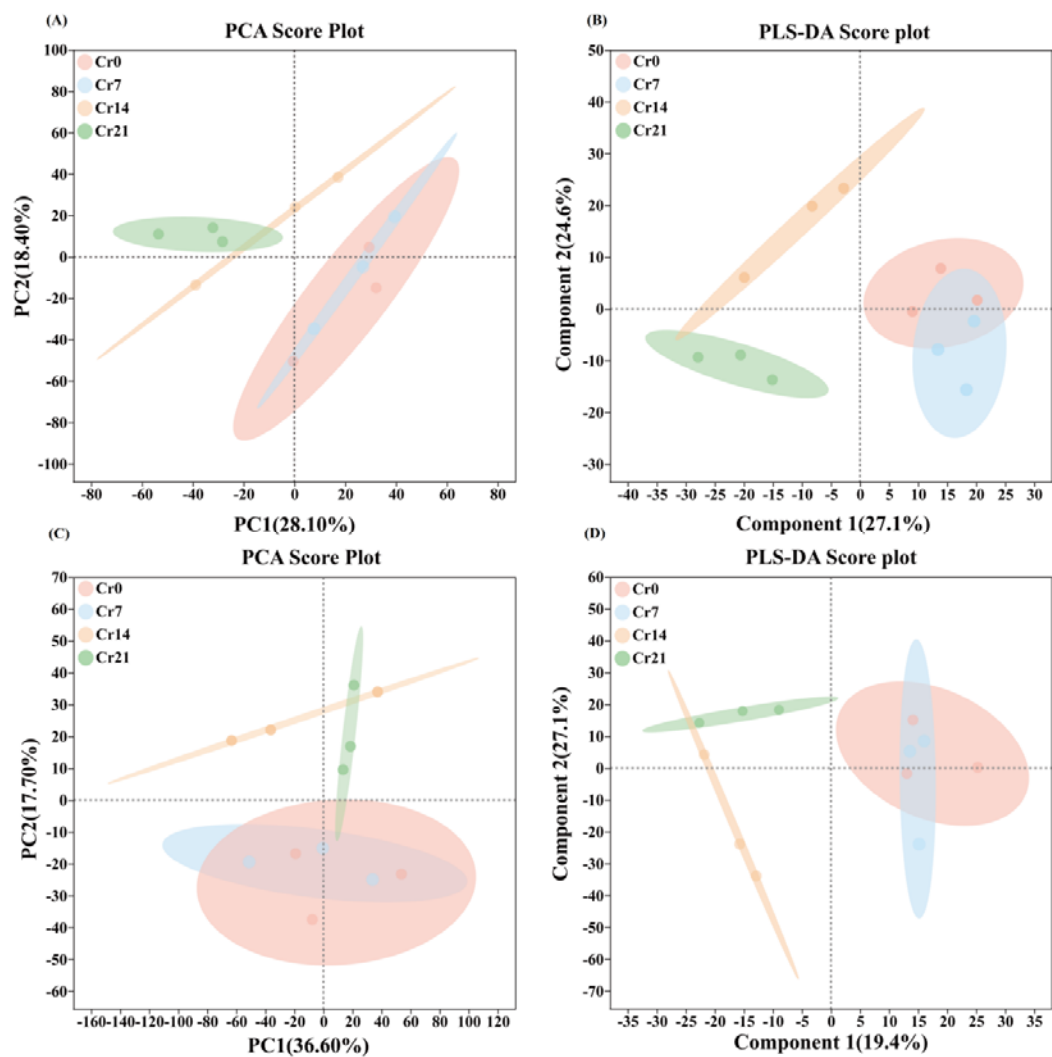

Fig. 3

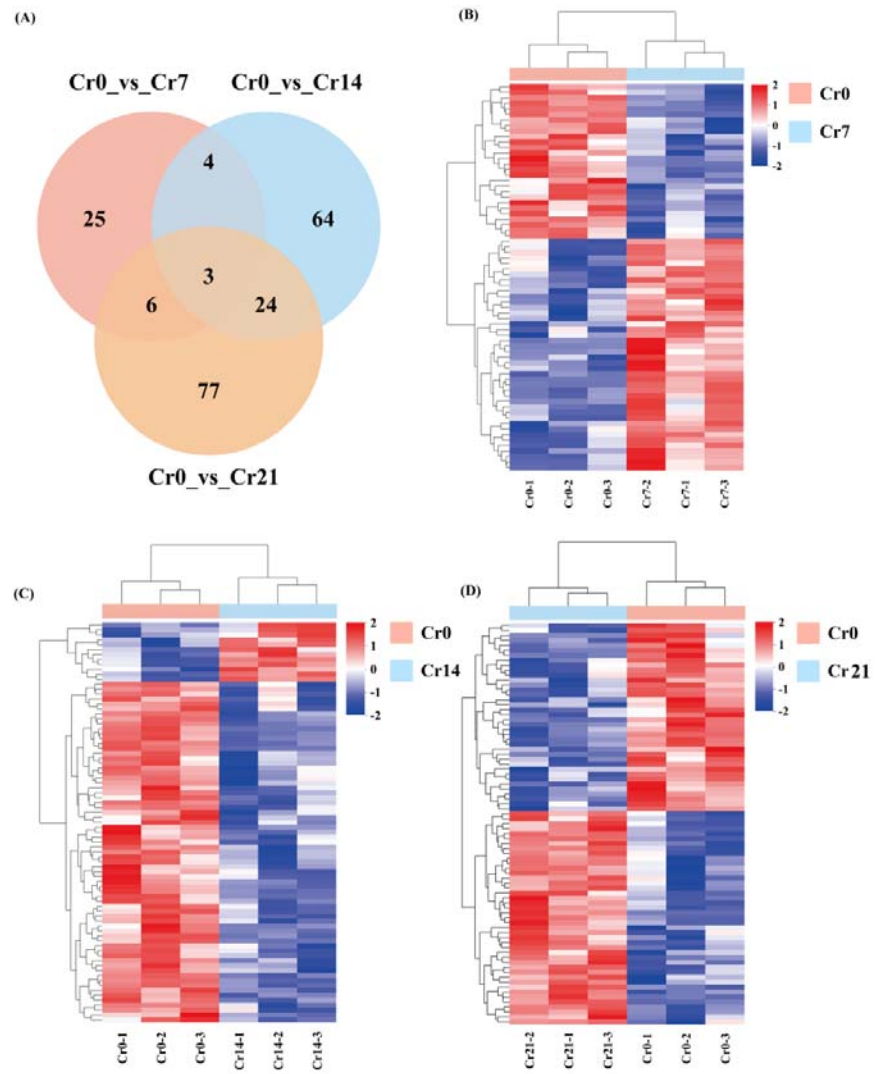

**Fig. 4**

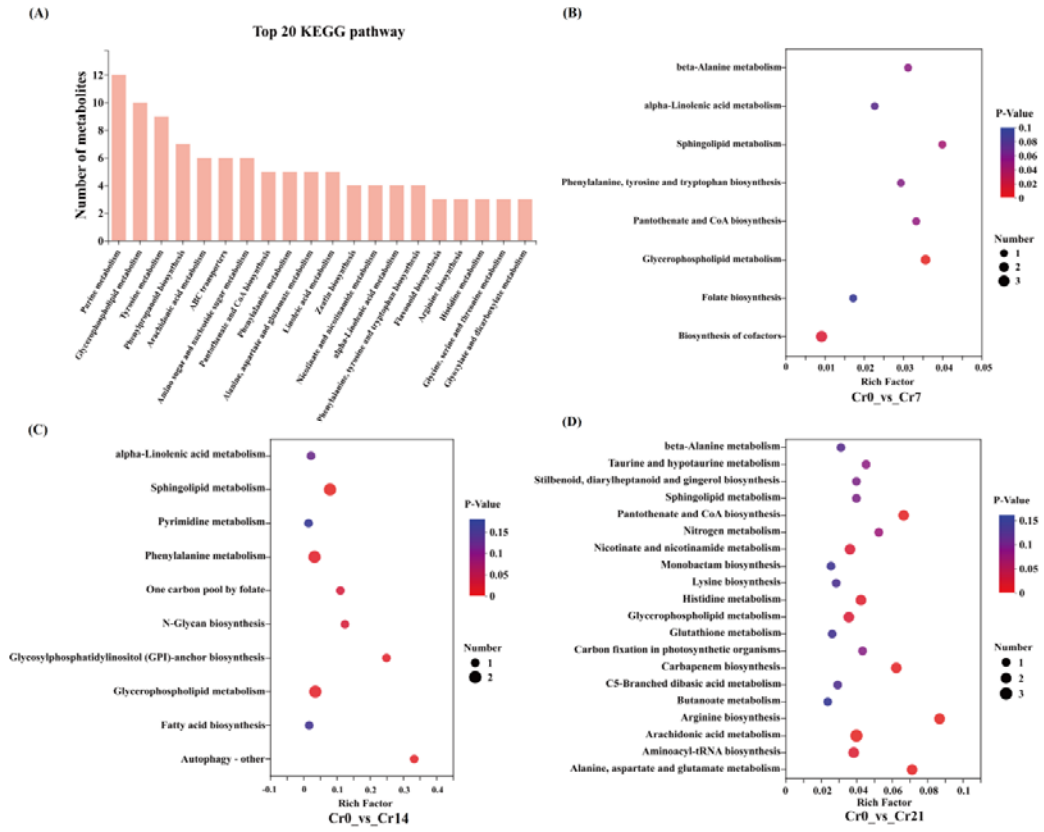

**Fig. 5**

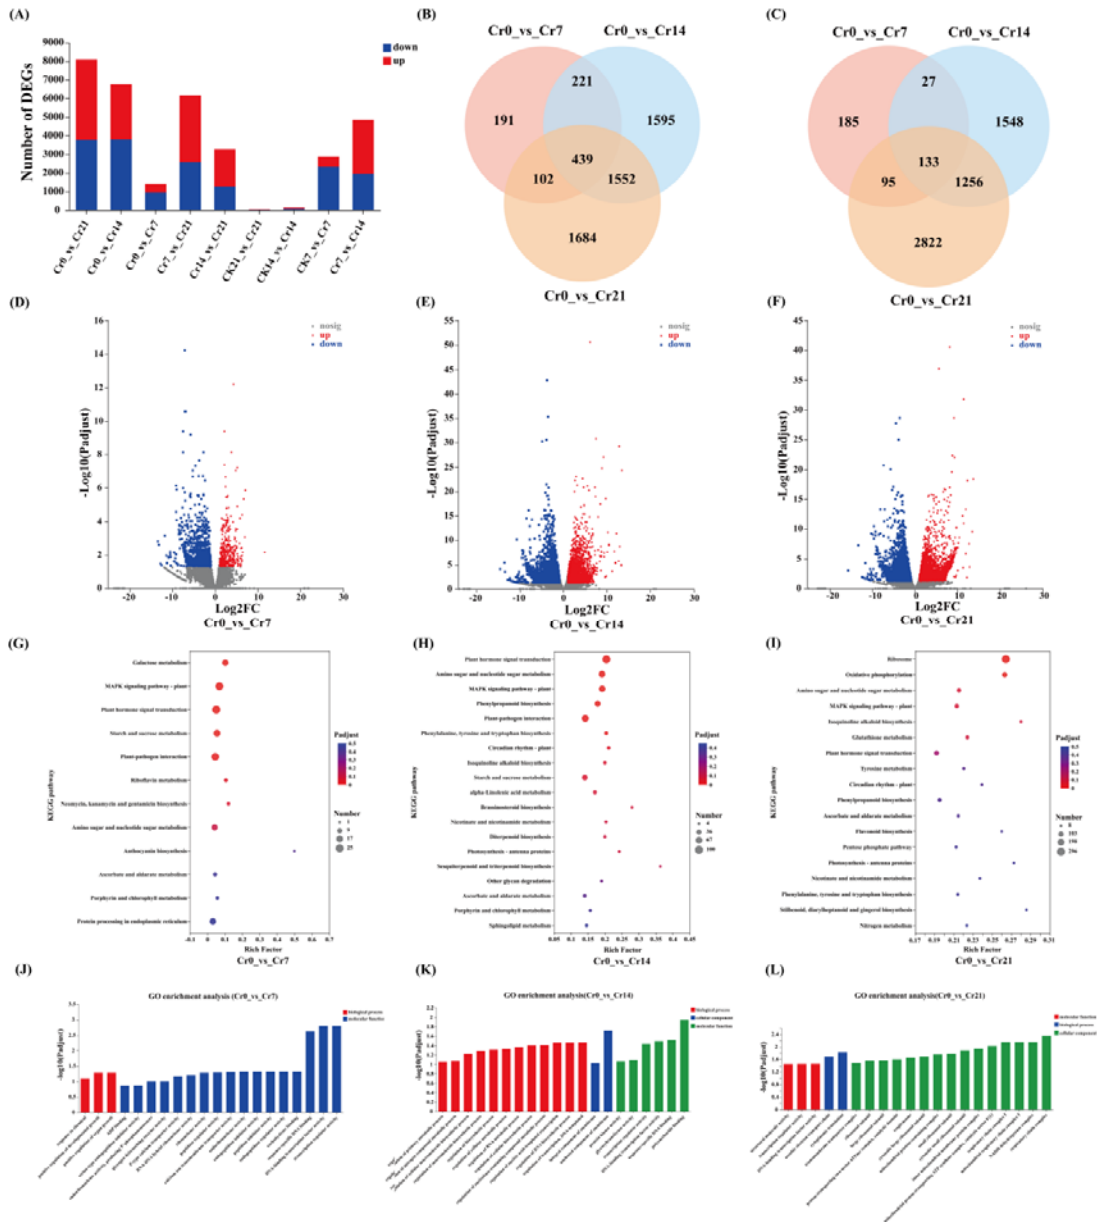

Fig. 6

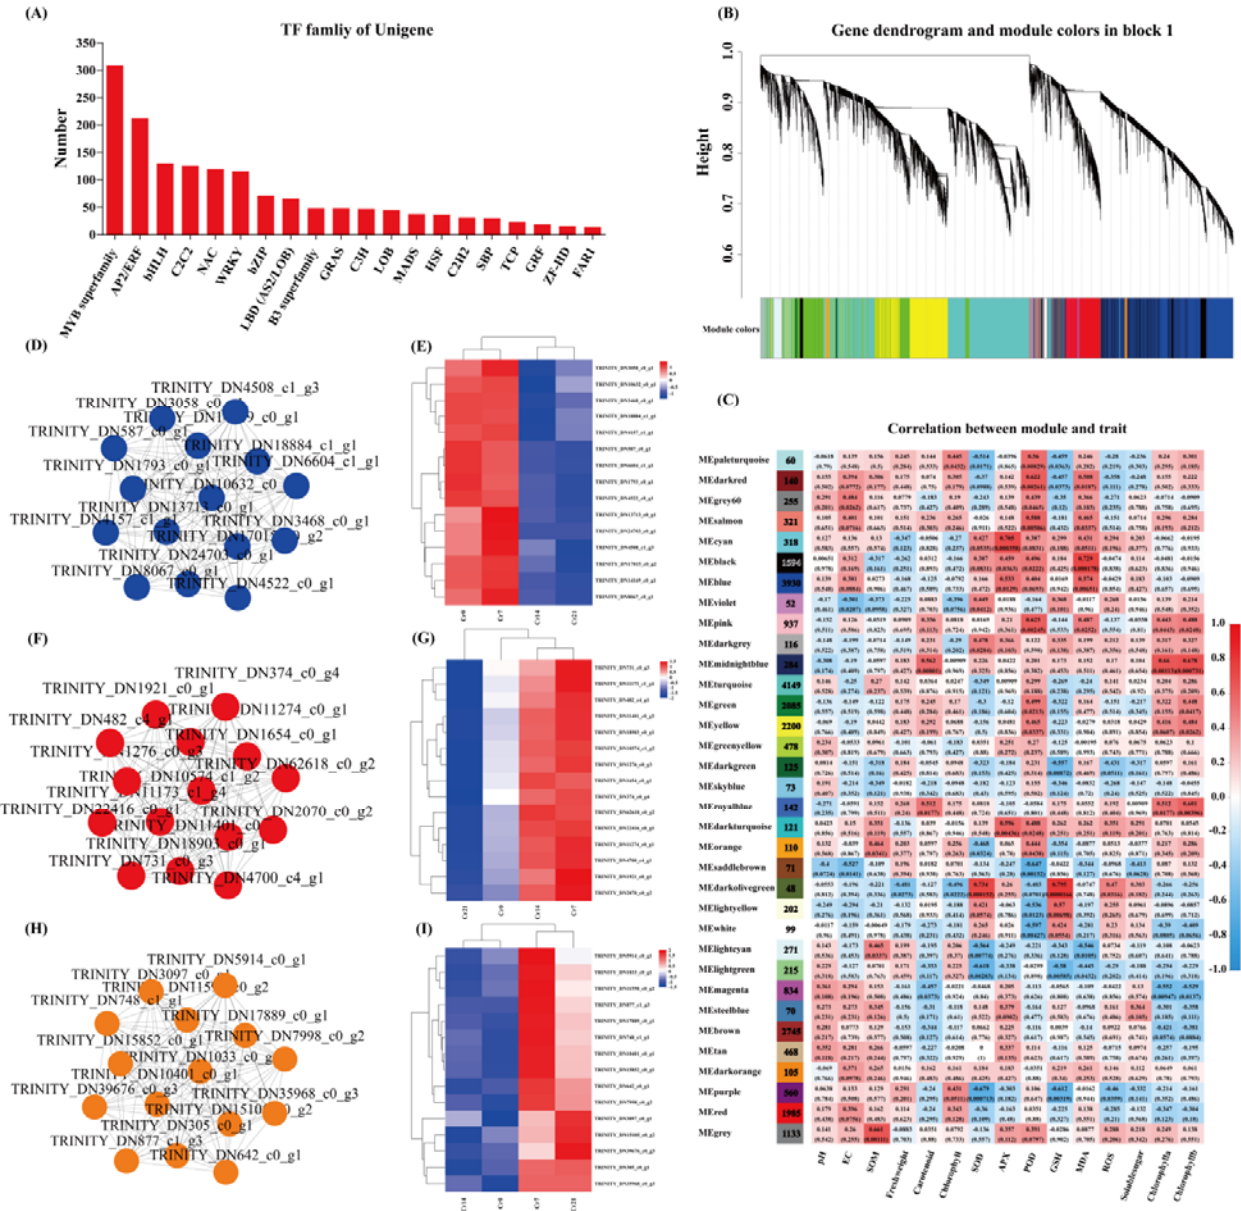



Fig. 7

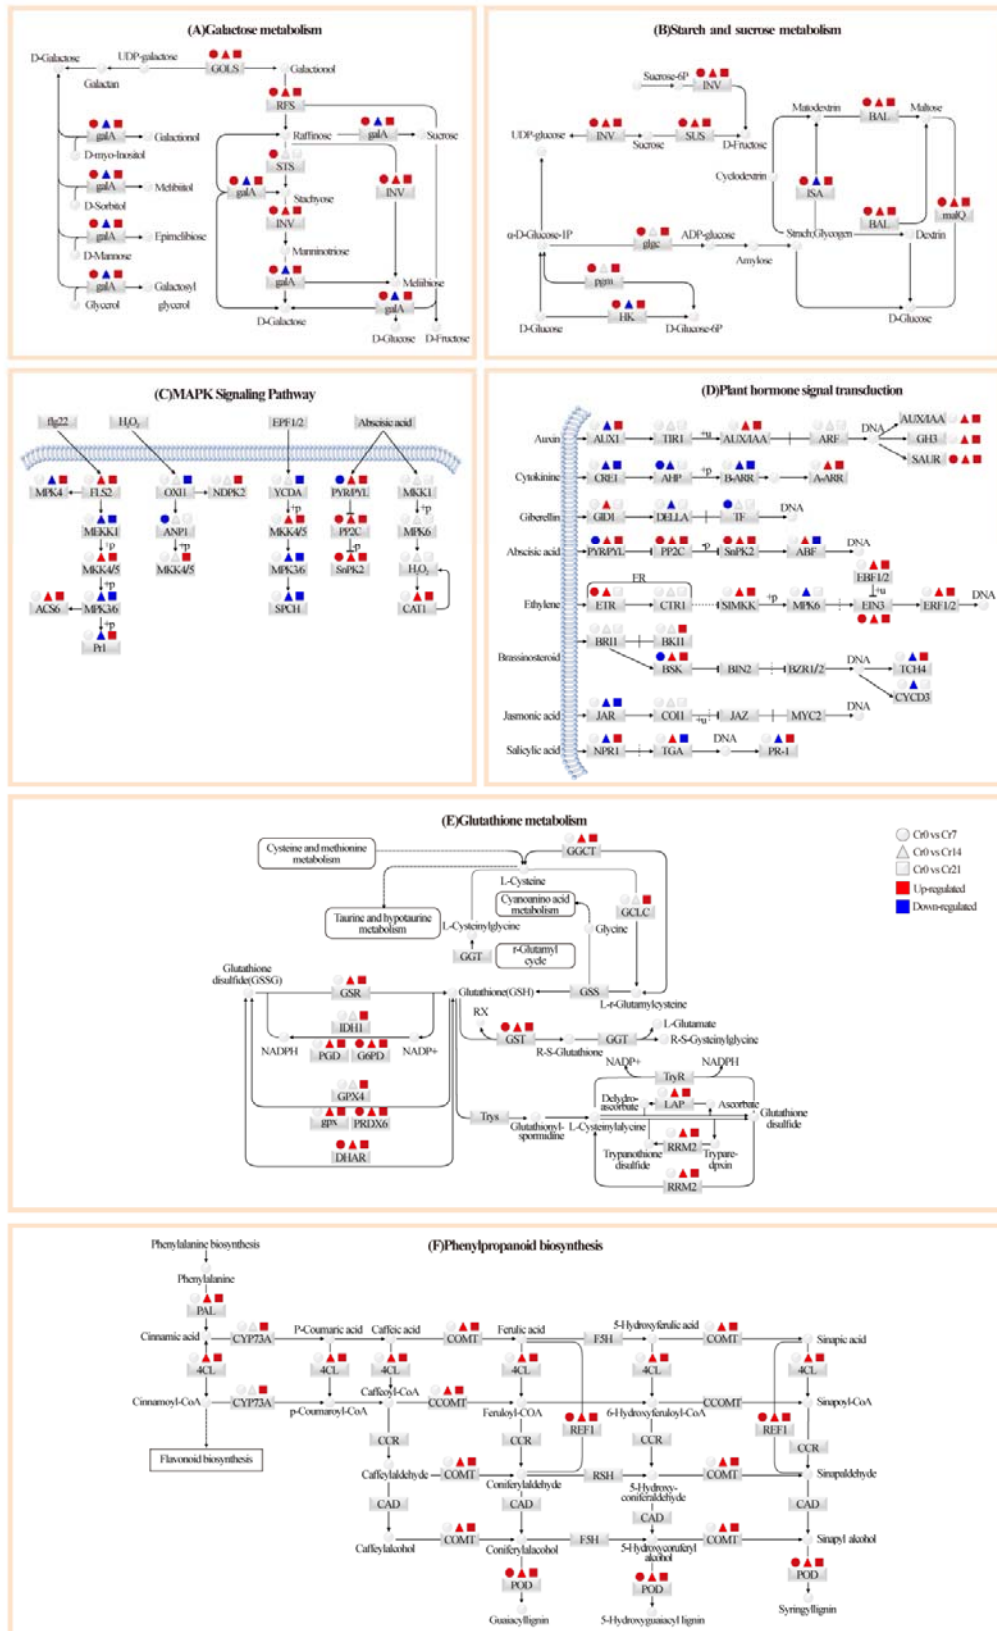

# Graphical Abstract

## Physiological transcription and metabolism

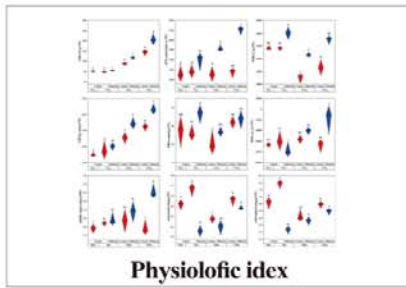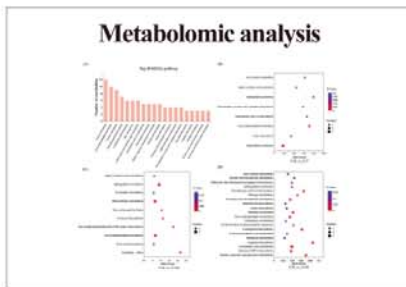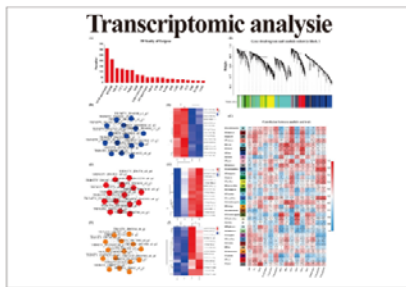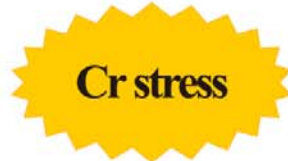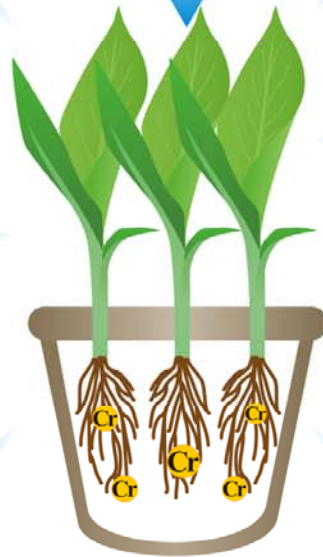

Molecular response mechanism of *Canna indica* under Cr stress

## Key stress pathways under temporal

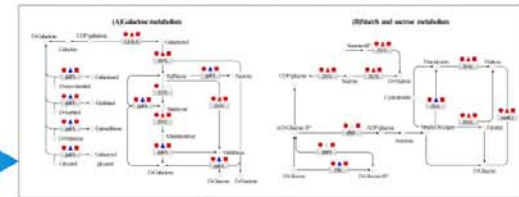

Seven days

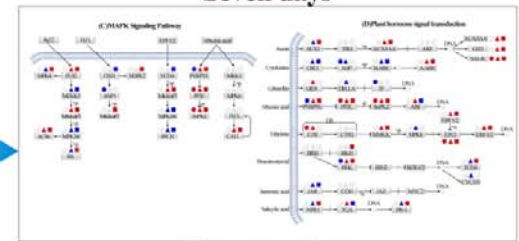

Fourteen days

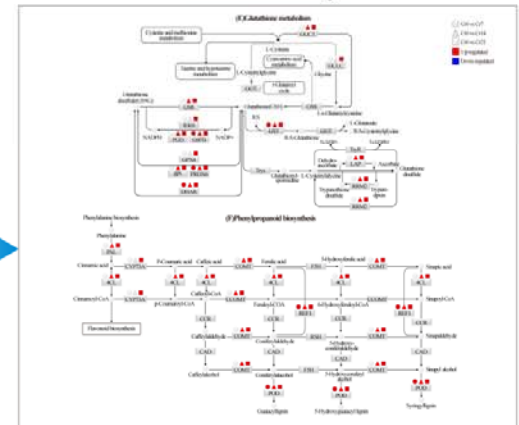

Twenty-one days

**Table 1**

**Table1 Accumulation and transport of heavy metal Cr by *Canna indica***

| Group | Cr(VI) in soil<br>(mg/kg) | Cr(III) in soil<br>(mg/kg) | Cr(VI) in leaves<br>(mg/kg) | Cr(III) in leaves<br>(mg/kg) |
|-------|---------------------------|----------------------------|-----------------------------|------------------------------|
| Cr0   | 12.40±0.26d               | 29.36±0.37f                | 0.44±0.07d                  | 1.04±0.11c                   |
| CK7   | 13.27±0.31b               | 37.89±0.20d                | 0.39±0.05d                  | 1.11±0.05c                   |
| Cr7   | 14.60±0.26a               | 117.84±2.05a               | 4.75±0.58c                  | 9.45±0.41b                   |
| CK14  | 12.30±0.36d               | 33.62±0.17e                | 0.56±0.05d                  | 1.19±0.04c                   |
| Cr14  | 13.10±0.28bc              | 85.68±1.32b                | 6.22±0.82b                  | 14.54±0.46a                  |
| CK21  | 12.50±0.37d               | 28.13±0.91f                | 0.73±0.06d                  | 1.36±0.15c                   |
| Cr21  | 12.67±0.15cd              | 65.93±0.96c                | 8.82±0.45a                  | 15.34±1.73a                  |

Data within the same followed by a string of the same lowercase letters are not significantly different ( $P > 0.05$ ). At the same time, a string of different letters shows a significant difference ( $P < 0.05$ ).
